# Supplementary material for: Dual Role of a Ricinoleic Acid Derivative in the Aqueous Synthesis of Silver Nanoparticles
Source: Hindawi journal article supplement (doi:10.1155/2017/1230467), 2017-01-01
Supplement: f1 [file 1230467.f1.doc]

Supporting information

Amount of free fatty acids in the castor oil1: 90 %

FTIR and NMR1H data of ricinoleic acid

**FTIR** ( cm-1 KBr): 3450 (O-H), 3010 (HC=CH), 1710 (C=O)

**NMR1H** ( ppm, 60 MHz, CCl4): 0.80 (3H, t, CH3); 1.20 (20H, s, CH2); 1.40 (2H, m, CH2COOH); 1.98 (2H, m, CH2CH=CH); 2.20 (2H, t, CH2COOH); 3.60 (1H, s, OH); 4.00 (1H, m, CHOH); 5.48 (2H, m, HC=CH).

FTIR and NMR1H data of epoxidized ricinoleic acid

**FTIR** ( cm-1 KBr): 3400 – 3200 (O-H), 3000 – 3010 (HC-CH), 1710 (C=O), 1210 (C-O-C).

**NMR1H** ( ppm, 60 MHz, CCl4): 0.90 (3H, t, CH3); 1.30 (26H, s, CH2); 2.30 (2H, t, CH2COOH); 3.40 (1H, m, CHOH); 5.50 (1H, m, CHOH).

Both FTIR and NMR indicate substitution of the double bond with a C-O-C group upon epoxidation.

Reference

T. N. Castro Dantas, E. Ferreira Moura, H. Scatena Júnior, A. A. Dantas Neto and A. Gurgel*, Colloids and Surfaces A: Physicochem. Eng. Aspec*ts, 2002**, 2**07, 243-252.
